# Supplementary material for: Patient Portal Utilization Among Ethnically Diverse Low Income Older Adults: Observational Study
Source: PubMed Central journal article supplement (PMC5705857; doi:10.2196/medinform.8026), 2017-11-14
Supplement: medinform_v5i4e47_app1.pdf [file medinform_v5i4e47_app1.pdf]

## Patient Portal Utilization among Ethnically Diverse Low Income Older Adults

### Supplemental Tables

#### **Patient Portal Features Used by Participants Who Use Their Patient Portal (n = 41)**

|                                              | n  | %    |
|----------------------------------------------|----|------|
| <b>Patient Portal Feature Used</b>           |    |      |
| Send a message to your doctor or nurse       | 28 | 68.3 |
| Refill prescriptions                         | 18 | 43.9 |
| View lab or test results                     | 37 | 90.2 |
| Make or change an appointment                | 21 | 51.2 |
| Request a referral                           | 7  | 17.1 |
| Find information about a health issue        | 17 | 41.5 |
| Other                                        | 6  | 14.6 |
| <b>Number of Patient Portal Feature Used</b> |    |      |
| 1                                            | 8  | 19.5 |
| 2                                            | 6  | 14.6 |
| 3                                            | 7  | 17.1 |
| 4                                            | 12 | 29.3 |
| 5 or more                                    | 8  | 19.5 |

**Perceptions of the Patient Portal Among Participants Who Use Their Patient Portal (n = 41)**

|                                                                                                     | n  | %     |
|-----------------------------------------------------------------------------------------------------|----|-------|
| <b>Perceptions of Patient Portal</b>                                                                |    |       |
| It was easy to register to use my patient portal.                                                   | 36 | 87.80 |
| It is easy logging into my patient portal.                                                          | 38 | 92.68 |
| My medical information on my patient portal is accurate and up-to-date.                             | 34 | 82.93 |
| It is easy to navigate to different reports or lists and other features of my patient portal.       | 32 | 78.05 |
| The information on my patient portal is easy to understand.                                         | 34 | 82.93 |
| Using my patient portal makes me feel more connected with my doctor.                                | 33 | 80.49 |
| My communication with my doctor's office has been better since I've been using my patient portal.   | 25 | 60.98 |
| Overall I'm satisfied with my patient portal.                                                       | 33 | 80.49 |
| Using my patient portal can enable me to accomplish tasks more quickly                              | 30 | 73.17 |
| Using my patient portal can make it easier to do my tasks                                           | 29 | 70.73 |
| Learning to use my patient portal is easy for me                                                    | 35 | 85.37 |
| My interaction with my patient portal is clear and understandable                                   | 36 | 87.80 |
| I always try to use my patient portal to do a task whenever it has a feature to help me perform it. | 27 | 65.85 |
| I expect my use of my patient portal to continue in the future.                                     | 38 | 92.68 |
| Using my patient portal can take up too much of my time when performing many tasks.                 | 4  | 9.76  |
| I have a great deal of experience using my patient portal.                                          | 24 | 58.54 |
| <b>Total Number of Positive Responses</b>                                                           |    |       |
| 3                                                                                                   | 1  | 2.44  |
| 4                                                                                                   | 2  | 4.88  |
| 7                                                                                                   | 1  | 2.44  |
| 10                                                                                                  | 5  | 12.20 |
| 11                                                                                                  | 4  | 9.76  |
| 12                                                                                                  | 3  | 7.32  |
| 13                                                                                                  | 2  | 4.88  |
| 14                                                                                                  | 8  | 19.51 |
| 15                                                                                                  | 5  | 12.20 |
| 16                                                                                                  | 10 | 24.39 |
